# Supplementary material for: Probing the key roles of the back interface in the performance of carbon-based hole-transport-layer free perovskite solar cells
Source: Royal Society of Chemistry journal article supplement (doi:10.1039/d4ta06143h), 2024-01-01
Supplement: d4ta06143h1.pdf [file d4ta06143h1.pdf]

## Supplementary Information

### Probing the Key Roles of Back-Interface in Performance of Carbon-Based Hole-Transport-Layer Free Perovskite Solar Cells

*Xinwei Li,<sup>a</sup> Nianqing Fu,<sup>\*ab</sup> Xiaocao Peng,<sup>a</sup> Hehui Lin,<sup>a</sup> Jiaang Cheng,<sup>a</sup> Ziming Chen,<sup>a</sup> Peng Lin,<sup>\*c</sup> and Jun Du<sup>a</sup>*

<sup>a</sup> School of Materials Science and Engineering, South China University of Technology, Guangzhou 510641, P. R. China.

<sup>b</sup> Guangdong Provincial Key Laboratory of Advanced Energy Storage Materials, Guangzhou 510641, P. R. China.

<sup>c</sup> Guangdong Provincial Key Laboratory of New Energy Materials Service Safety, College of Materials Science and Engineering, Shenzhen University, Shenzhen 518060, P. R. China

#### Corresponding Authors

Nianqing Fu, *E-mail:* [msnqfu@scut.edu.cn](mailto:msnqfu@scut.edu.cn)

Peng Lin, *E-mail:* [lin.peng@szu.edu.cn](mailto:lin.peng@szu.edu.cn)

**KEYWORDS:** Carbon-based perovskite solar cells; Back-interface contact; Surface roughness; Surface potential; Charge transfer.

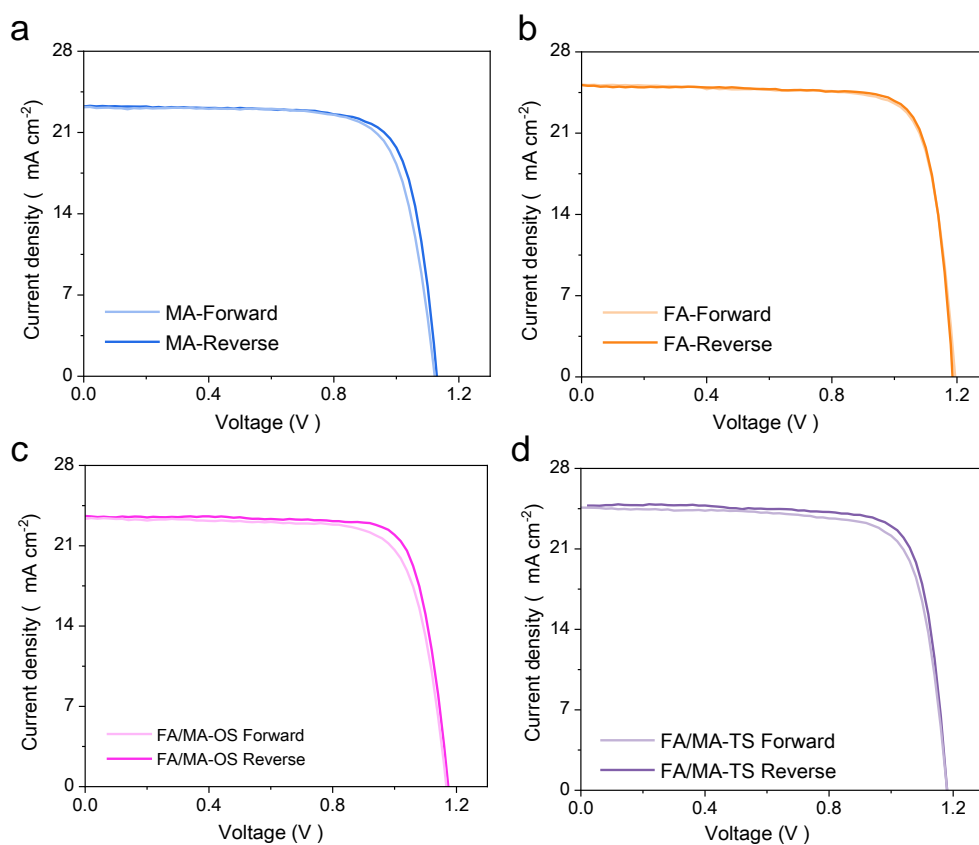

**Figure S1.** The photocurrent density-voltage curves of MAPbI<sub>3</sub>, FAPbI<sub>3</sub>, FA/MA-OS, and FA/MA-TS absorbers-based M-PSCs.

**Table S1.** Photovoltaic parameters of M-PSCs employing various absorbers

| Devices            | $J_{sc}$<br>(mA/cm <sup>2</sup> ) | $V_{oc}$ (V) | FF (%) | PCE (%) | Hysteresis Index<br>(%) |
|--------------------|-----------------------------------|--------------|--------|---------|-------------------------|
| MA-Forward         | 23.19                             | 1.12         | 75.21  | 19.57   | 2.83                    |
| MA- Reverse        | 23.28                             | 1.12         | 76.67  | 20.14   |                         |
| FA-Forward         | 25.15                             | 1.19         | 78.73  | 23.63   | 1.04                    |
| FA- Reverse        | 25.13                             | 1.18         | 80.35  | 23.88   |                         |
| FA/MA-OS -Forward  | 23.36                             | 1.16         | 76.11  | 20.71   | 5.39                    |
| FA/MA-OS - Reverse | 23.56                             | 1.17         | 79.34  | 21.89   |                         |
| FA/MA-TS-Forward   | 24.57                             | 1.17         | 76.23  | 22.07   | 3.83                    |
| FA/MA-TS- Reverse  | 24.79                             | 1.17         | 78.69  | 22.95   |                         |

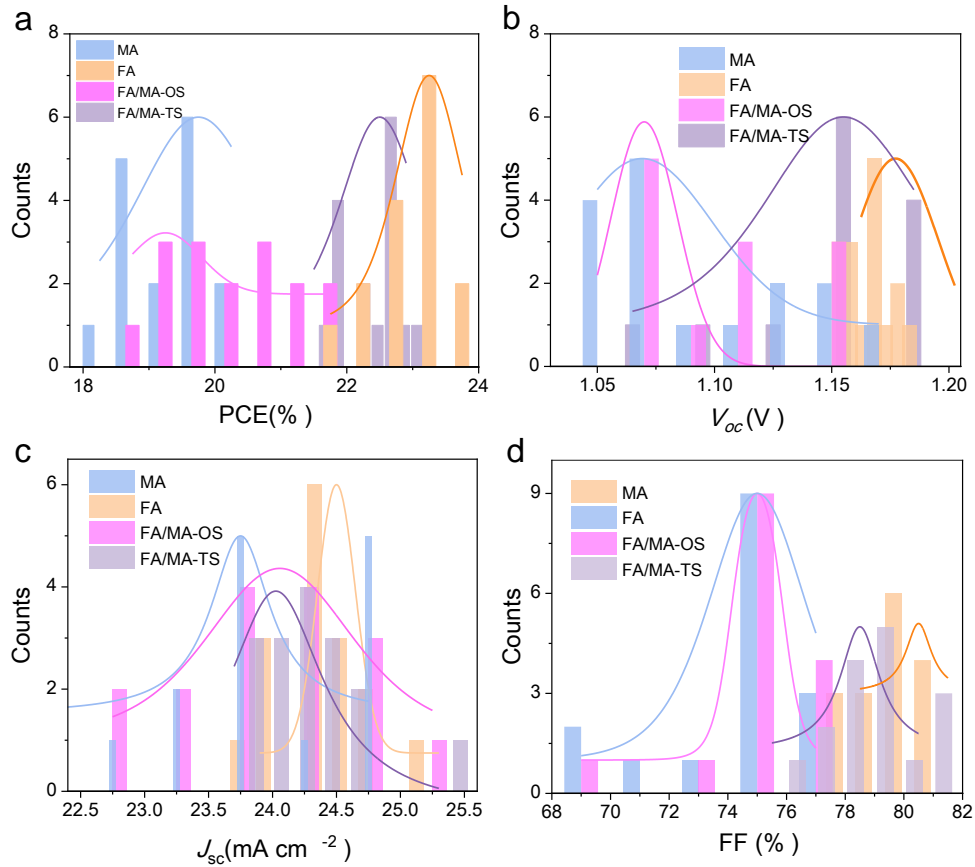

**Figure S2.** Histograms of PCE,  $V_{oc}$ ,  $J_{sc}$ , and FF values of M-PSCs employing MAPbI<sub>3</sub>, FAPbI<sub>3</sub>, FA/MA-OS, and FA/MA-TS absorbers.

**Table S2.** Photovoltaic parameters of C-PSCs employing various absorbers.

| Devices            | $J_{sc}$ (mA/cm <sup>2</sup> ) | $V_{oc}$ (V) | FF (%) | PCE (%) | Hysteresis Index (%) |
|--------------------|--------------------------------|--------------|--------|---------|----------------------|
| MA-Forward         | 23.38                          | 0.98         | 50.30  | 11.59   | 24.83                |
| MA- Reverse        | 23.60                          | 0.99         | 65.39  | 15.42   |                      |
| FA-Forward         | 17.65                          | 0.95         | 51.59  | 8.72    | 31.71                |
| FA- Reverse        | 21.78                          | 0.95         | 61.47  | 12.77   |                      |
| FA/MA-OS -Forward  | 18.30                          | 0.93         | 39.95  | 6.82    | 30.33                |
| FA/MA-OS - Reverse | 18.82                          | 0.95         | 54.52  | 9.79    |                      |
| FA/MA-TS-Forward   | 19.59                          | 0.87         | 40.15  | 6.88    | 34.03                |
| FA/MA-TS- Reverse  | 19.87                          | 0.92         | 56.77  | 10.43   |                      |

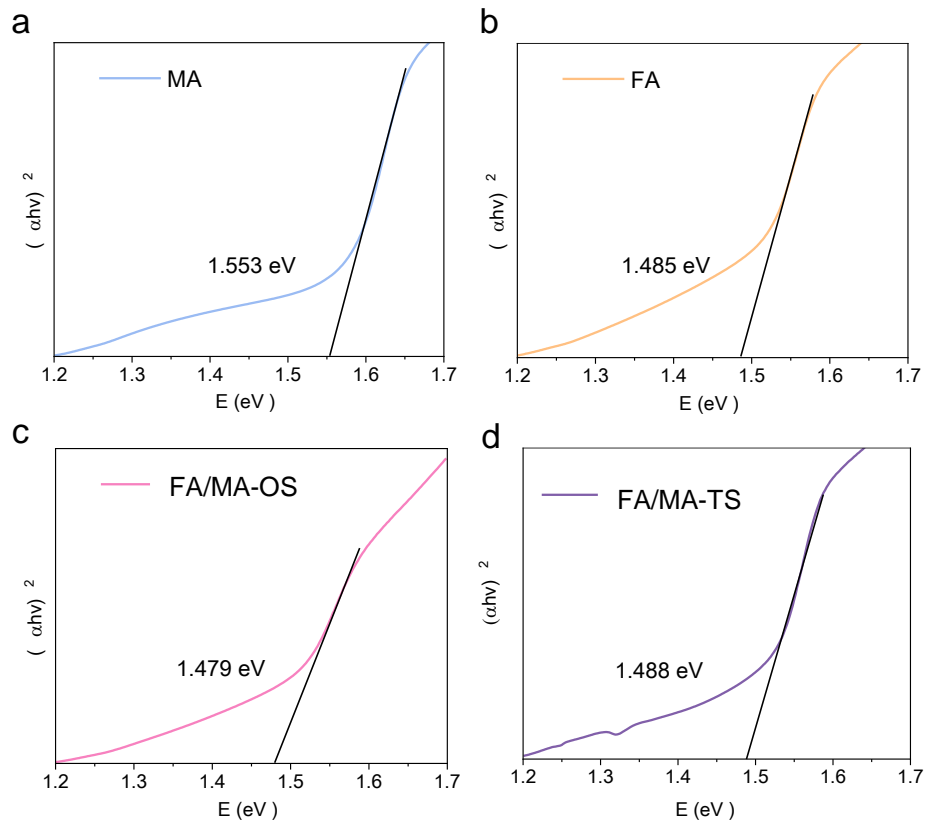

**Figure S3.** Tauc plots of MAPbI<sub>3</sub>, FAPbI<sub>3</sub>, FA/MA-OS and FA/MA-TS perovskite films.

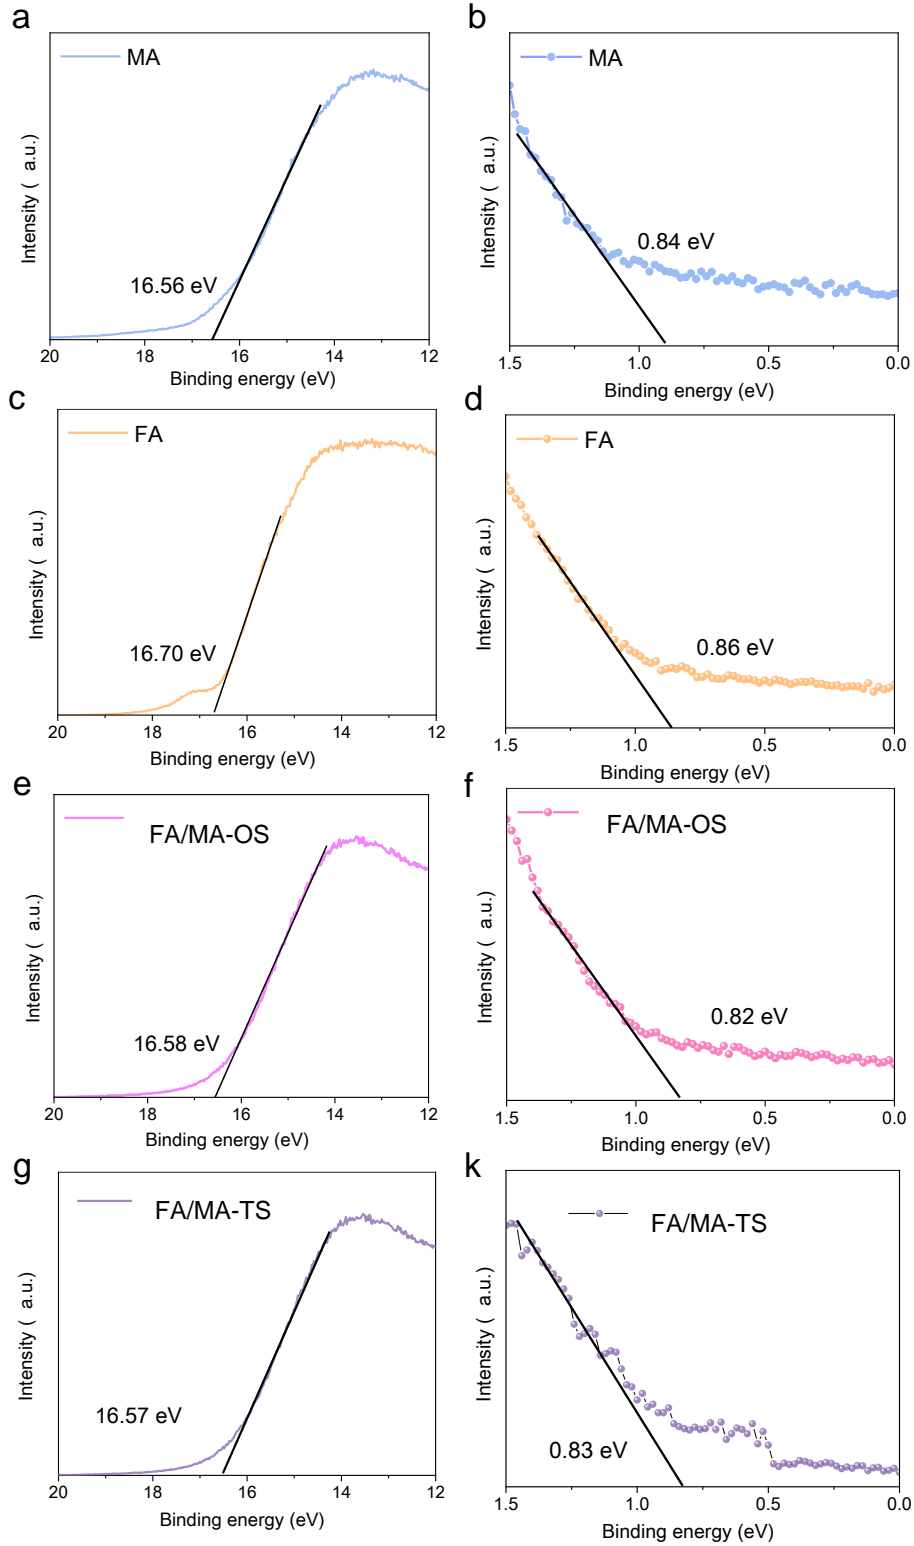

**Figure S4.** UPS spectra showing the cutoff regions and Fermi edges of (a, b) MAPbI<sub>3</sub>, (c, d) FAPbI<sub>3</sub>, (e, f) FA/MA-OS, and (g, k) FA/MA-TS perovskite films.

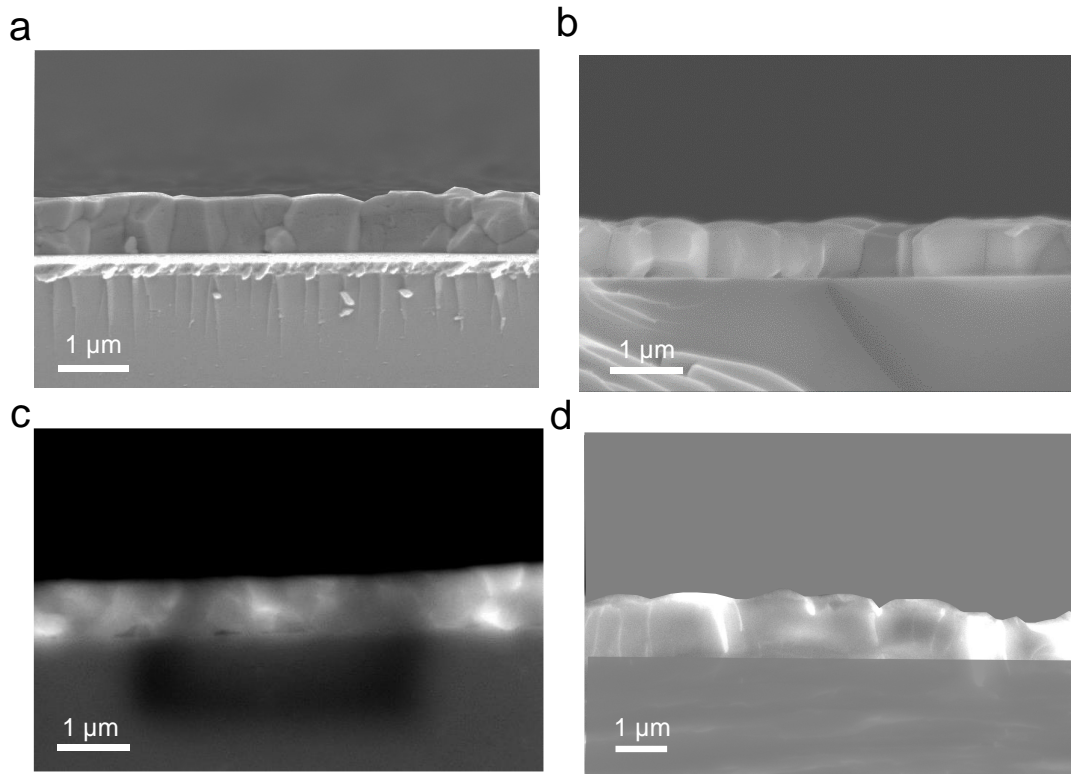

**Figure S5.** Cross-sectional SEM images of (a) MAPbI<sub>3</sub>, (b) FAPbI<sub>3</sub>, (c) FA/MA-OS, and (d) FA/MA-TS perovskite films.

**Table S3.** EIS fitting results for C-PSCs based on four perovskite absorbers.

| Devices  | $R_s$ ( $\Omega$ ) | $R_{ct}$ ( $\Omega$ ) | $R_{rec}$ ( $\Omega$ ) |
|----------|--------------------|-----------------------|------------------------|
| MA       | 1.17               | 0.40                  | 29.51                  |
| FA       | 1.23               | 1.24                  | 13.74                  |
| FA/MA-OS | 1.22               | 0.52                  | 19.77                  |
| FA/MA-TS | 1.21               | 1.69                  | 20.10                  |
